# Supplementary material for: Landscape of submitochondrial protein distribution
Source: PubMed Central journal article supplement (PMC5561175; doi:10.1038/s41467-017-00359-0), 2017-08-18

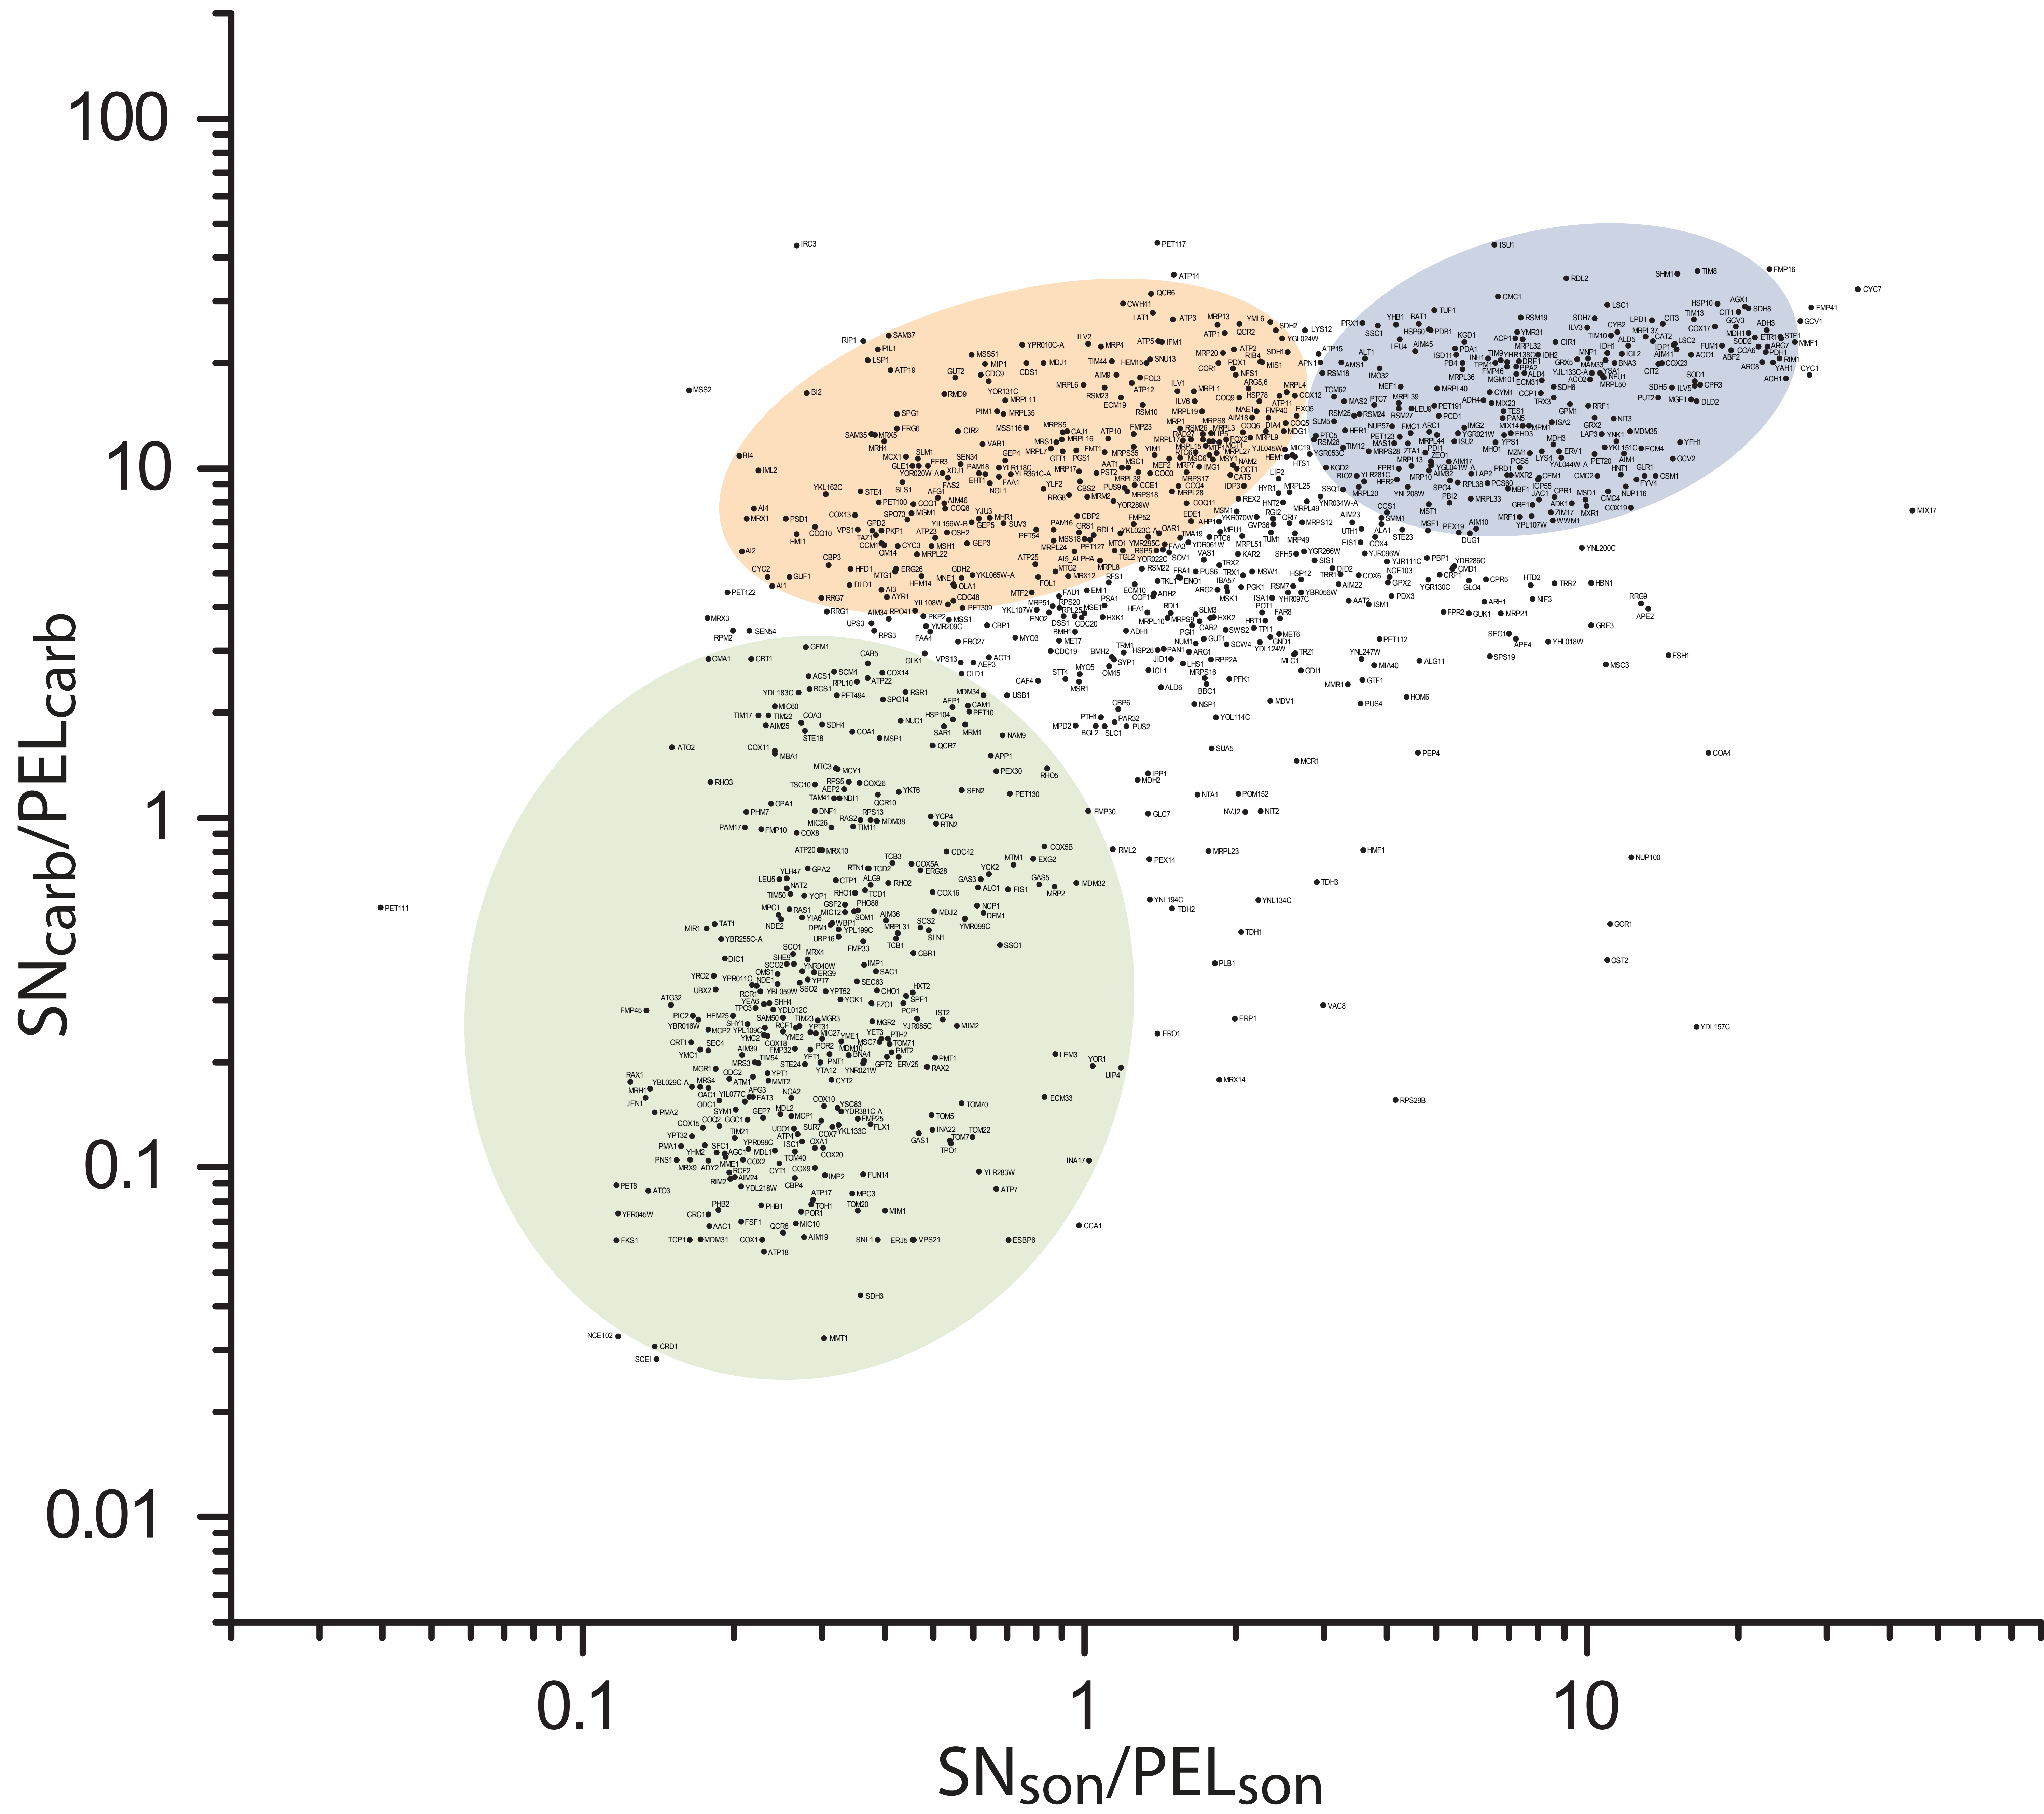

Supplement: 41467_2017_359_MOESM3_ESM.pdf [file 41467_2017_359_MOESM3_ESM.pdf]
